# Supplementary material
Source: PubMed Central journal article supplement (PMC4374167)
Supplement: NIHMS61781-supplement-1.pdf [file NIHMS61781-supplement-1.pdf]

## A cnidarian homologue of an insect gustatory receptor functions in developmental body patterning

Michael Saina, Henriette Busengdal, Chiara Sinigaglia, Libero Petrone, Paola Oliveri, Fabian Rentzsch and Richard Benton

### Supplementary Information

*NvecGrl2* RNA

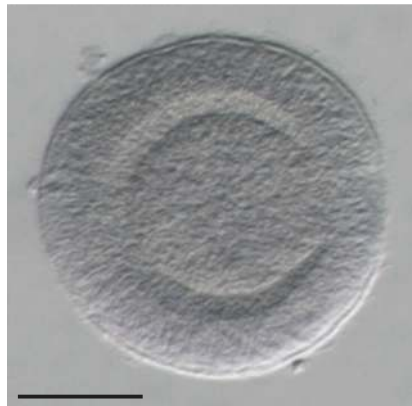

**Supplementary Figure 1** | *In situ* expression analysis of *NvecGrl2*  
RNA in situ hybridisation using a riboprobe against *NvecGrl2* on a whole mount *N. vectensis* gastrula-stage embryo. No signal is detectable. Scale bar = 50  $\mu$ m.

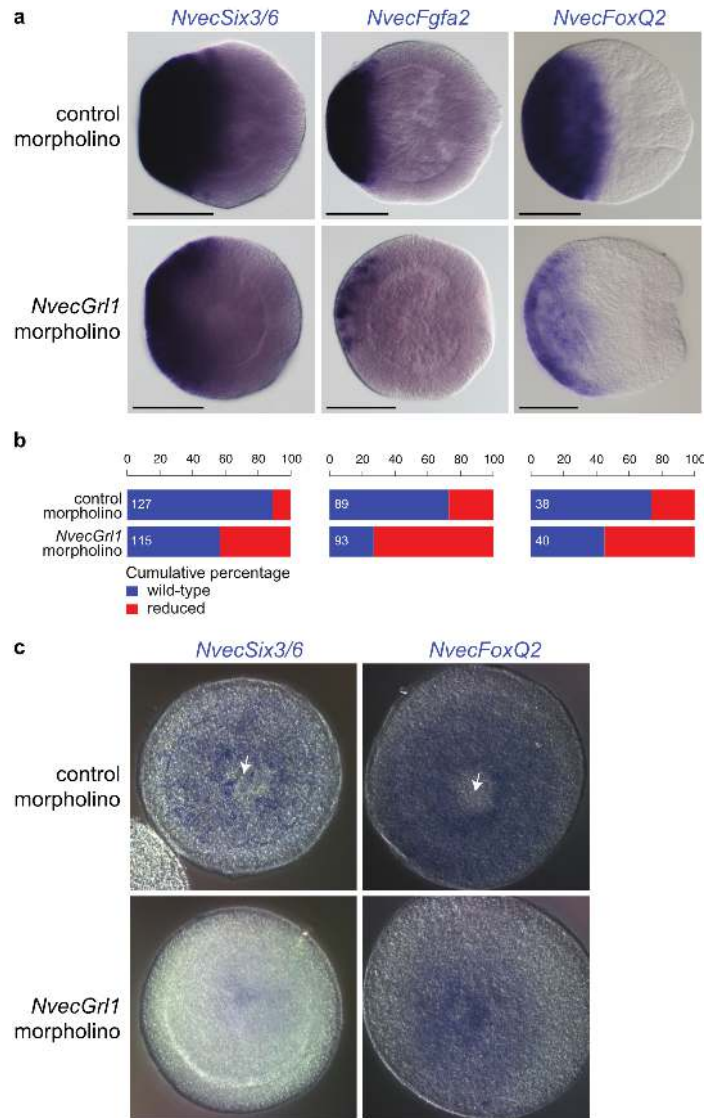

**Supplementary Figure 2 | Gene expression defects in *NvecGr1* morphants.**

(a) RNA in situ hybridisation using riboprobes against marker genes in animals injected with control (control#2) or *NvecGr1* (*NvecGr1*#2) morpholino oligonucleotides. The arboral side is on the left in all specimens. Quantification of gene expression phenotypes of the morphants is shown below. The n for each marker/morpholino combination is shown in white in each bar. Scale bars = 100  $\mu$ m.

(b) Arboral view of animals injected, as in Fig. 5, with either control (control#1) or *NvecGr1* (*NvecGr1*#1) morpholino oligonucleotides subjected to RNA in situ hybridisation using probes against the indicated markers. The arrows mark the “apical spot”, where expression of *NvecSix3/6* and *NvecFoxQ2* are excluded, which precedes the appearance of the apical organ in this region<sup>1</sup>.

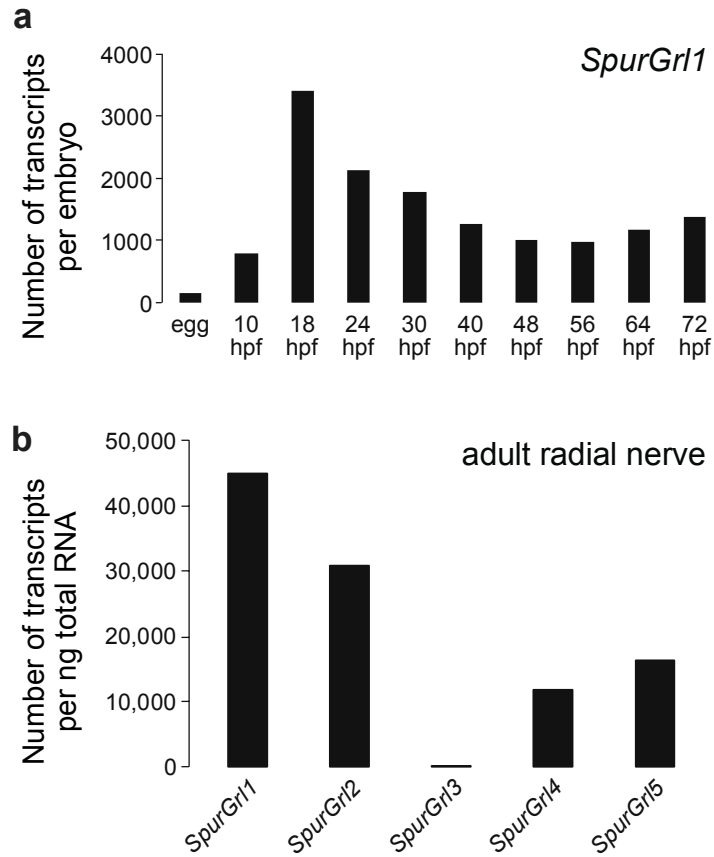

**Supplementary Figure 3 | Gene expression analysis of *S. purpuratus* Grls.**

(a) Developmental analysis of transcripts levels by RNA-seq of *SpurGrl1* from [www.spbase.org:3838/quantdev/2](http://www.spbase.org:3838/quantdev/2).

(b) Quantitative RT-PCR analysis of the five *SpurGrl* genes in the adult radial nerve, a prominent structure in the sea urchin nervous system. *SpurGrl3* is expressed at low, but above-background, levels.

**Supplementary Table 1 | GrI nomenclature and source data.**

| Species                              | Protein name    | Source accession number | Data source                                   |
|--------------------------------------|-----------------|-------------------------|-----------------------------------------------|
| <i>Capitella teleta</i>              | <i>CtelGr1</i>  | ELT92320                | 3                                             |
|                                      | <i>CtelGr2</i>  | ELT92788                |                                               |
|                                      | <i>CtelGr3</i>  | ELT90076                |                                               |
|                                      | <i>CtelGr4</i>  | ELU10797                |                                               |
|                                      | <i>CtelGr5</i>  | ELT90075                |                                               |
|                                      | <i>CtelGr6</i>  | ELU14052                |                                               |
|                                      | <i>CtelGr7</i>  | ELT97787                |                                               |
|                                      | <i>CtelGr8</i>  | ELU10343                |                                               |
|                                      | <i>CtelGr9</i>  | ELT92997                |                                               |
|                                      | <i>CtelGr10</i> | ELT90557                |                                               |
|                                      | <i>CtelGr11</i> | ELU06252                |                                               |
|                                      | <i>CtelGr12</i> | ELU13825                |                                               |
| <i>Helobdella robusta</i>            | <i>HrobGr1</i>  | 163318                  | 3                                             |
|                                      | <i>HrobGr2</i>  | 163317                  |                                               |
| <i>Lottia gigantea</i>               | <i>LgigGr1</i>  | 168741                  | 3                                             |
|                                      | <i>LgigGr2</i>  | 171766                  |                                               |
|                                      | <i>LgigGr3</i>  | 152656                  |                                               |
|                                      | <i>LgigGr4</i>  | 159388                  |                                               |
|                                      | <i>LgigGr5</i>  | 172086                  |                                               |
|                                      | <i>LgigGr6</i>  | 160675                  |                                               |
|                                      | <i>LgigGr7</i>  | 159430                  |                                               |
| <i>Crassostrea gigas</i>             | <i>CgigGr1</i>  | EKC21365                | 4                                             |
|                                      | <i>CgigGr2</i>  | EKC32937                |                                               |
| <i>Aplysia californica</i>           | <i>AcalGr1</i>  | XP_005105989.1          | Broad Institute, Harvard                      |
|                                      | <i>AcalGr2</i>  | XP_005105990.1          |                                               |
|                                      | <i>AcalGr3</i>  | XP_005099561.1          |                                               |
| <i>Saccoglossus kowalevskii</i>      | <i>SkowGr1</i>  | XM_002731392            | Baylor College of Medicine HGSC               |
| <i>Strongylocentrotus purpuratus</i> | <i>SpurGr1</i>  | XM_003730711            | 5                                             |
|                                      | <i>SpurGr2</i>  | Ctg127547               |                                               |
|                                      | <i>SpurGr3</i>  | Ctg127545-2             |                                               |
|                                      | <i>SpurGr4</i>  | Ctg127545-1             |                                               |
|                                      | <i>SpurGr5</i>  | Ctg131000               |                                               |
| <i>Lytechinus variegatus</i>         | <i>LvarGr1</i>  | Contig203256            | Baylor College of Medicine HGSC               |
|                                      | <i>LvarGr2</i>  | Contig339833            |                                               |
|                                      | <i>LvarGr3</i>  | Contig203252            |                                               |
|                                      | <i>LvarGr4</i>  | Contig122808            |                                               |
|                                      | <i>LvarGr5</i>  | Contig122810            |                                               |
|                                      | <i>LvarGr6</i>  | Contig203253            |                                               |
|                                      | <i>LvarGr7</i>  | Contig17632             |                                               |
| <i>Patiria miniata</i>               | <i>PminGr1</i>  | HP136897.1              | Baylor College of Medicine HGSC               |
| <i>Acropora digitifera</i>           | <i>AdigGr1</i>  | adi_EST_assem_4631      | <sup>6</sup>                                  |
| <i>Acropora millepora</i>            | <i>AmilGr1</i>  | EZ016165.1              | The Genome Institute at Washington University |
| <i>Nematostella vectensis</i>        | <i>NvecGr1</i>  | KP294348                | <sup>7</sup> and this work                    |
|                                      | <i>NvecGr2</i>  | KP294349                |                                               |
| <i>Trichoplax adhaerens</i>          | <i>TadhGr1</i>  | XM_002117218            | 8                                             |
|                                      | <i>TadhGr2</i>  | XM_002110287            |                                               |
|                                      | <i>TadhGr3</i>  | XM_002110288            |                                               |

**Supplementary Table 2 | qPCR data for *N. vectensis* Grs.**

| Samples                  | EF1<br>CNRQ | EF1<br>SE(CNRQ) | NvecGr1<br>CNRQ | NvecGr1<br>SE(CNRQ) | NvecGr2<br>CNRQ | NvecGr2<br>SE(CNRQ) | RibL<br>CNRQ | RibL<br>SE(CNRQ) |
|--------------------------|-------------|-----------------|-----------------|---------------------|-----------------|---------------------|--------------|------------------|
| unfertilised egg #1      | 1.3501      | 0.0430          | 3.3211          | 0.0623              | 9.0450          | 0.3981              | 0.7407       | 0.0193           |
| unfertilised egg #2      | 1.2540      | 0.0433          | 3.4095          | 0.1432              | 7.5778          | 0.3533              | 0.7975       | 0.0199           |
| unfertilised egg #3      | 1.2817      | 0.0187          | 4.2815          | 0.2560              | 7.6899          | 0.1144              | 0.7802       | 0.0164           |
| early cleavage 6 hpf #1  | 1.2307      | 0.0296          | 5.0873          | 0.2114              | 8.6304          | 0.6532              | 0.8125       | 0.0162           |
| early cleavage 6 hpf #2  | 1.5165      | 0.1245          | 3.6316          | 0.1626              | 7.3053          | 0.3620              | 0.6594       | 0.0475           |
| early cleavage 6 hpf #3  | 1.7952      | 0.0413          | 4.3050          | 0.2548              | 9.8793          | 0.2502              | 0.5570       | 0.0122           |
| early blastula 12 hpf #1 | 1.1916      | 0.0060          | 1.7518          | 0.1207              | 4.1646          | 0.2536              | 0.8392       | 0.0031           |
| early blastula 12 hpf #2 | 1.1731      | 0.0276          | 1.3881          | 0.0297              | 3.3569          | 0.1833              | 0.8524       | 0.0227           |
| early blastula 12 hpf #3 | 1.2705      | 0.0569          | 2.1652          | 0.1103              | 4.6190          | 0.2472              | 0.7871       | 0.0363           |
| late blastula 18 hpf #1  | 0.9684      | 0.0020          | 1.8517          | 0.1059              | 0.6966          | 0.0480              | 1.0326       | 0.0032           |
| late blastula 18 hpf #2  | 1.0161      | 0.0122          | 1.7343          | 0.0448              | 0.8839          | 0.0467              | 0.9841       | 0.0144           |
| late blastula 18 hpf #3  | 0.9265      | 0.0155          | 1.7744          | 0.1525              | 1.2228          | 0.0285              | 1.0794       | 0.0179           |
| gastrula 24 hpf #1       | 0.8781      | 0.0531          | 2.6723          | 0.1012              | 0.5965          | 0.0315              | 1.1388       | 0.0525           |
| gastrula 24 hpf #2       | 0.9129      | 0.0300          | 2.2372          | 0.0372              | 0.5175          | 0.0345              | 1.0954       | 0.0183           |
| gastrula 24 hpf #3       | 0.8815      | 0.0030          | 2.9678          | 0.1172              | 0.7310          | 0.0284              | 1.1344       | 0.0034           |
| early planula 36 hpf #1  | 0.7614      | 0.0125          | 1.1005          | 0.0232              | 0.4279          | 0.0132              | 1.3134       | 0.0322           |
| early planula 36 hpf #2  | 0.7371      | 0.0462          | 0.9164          | 0.0419              | 0.2371          | 0.0088              | 1.3566       | 0.0607           |
| early planula 36 hpf #3  | 0.7746      | 0.0161          | 1.3221          | 0.0248              | 0.4478          | 0.0230              | 1.2910       | 0.0291           |
| planula 48 hpf #1        | 0.7764      | 0.0162          | 0.4054          | 0.0082              | 0.3360          | 0.0176              | 1.2881       | 0.0374           |
| planula 48 hpf #2        | 0.7013      | 0.0203          | 0.2370          | 0.0057              | 0.1839          | 0.0044              | 1.4259       | 0.0526           |
| planula 48 hpf #3        | 0.6485      | 0.0419          | 0.5915          | 0.0281              | 0.4001          | 0.0253              | 1.5419       | 0.0819           |
| metamorphosis #1         | 0.9094      | 0.0392          | 0.1581          | 0.0039              | 0.2448          | 0.0071              | 1.0996       | 0.0369           |
| metamorphosis #2         | 1.0456      | 0.0306          | 0.1599          | 0.0066              | 0.2789          | 0.0210              | 0.9564       | 0.0440           |
| metamorphosis #3         | 0.9873      | 0.0345          | 0.1737          | 0.0060              | 0.2718          | 0.0145              | 1.0128       | 0.0238           |
| primary polyp #1         | 0.9410      | 0.0388          | 0.1319          | 0.0040              | 0.2769          | 0.0118              | 1.0627       | 0.0426           |
| <b>Reference Target</b>  | <b>M</b>    | <b>CV</b>       |                 |                     |                 |                     |              |                  |
| EF1                      | 0.7060      | 0.258           |                 |                     |                 |                     |              |                  |
| RibL                     | 0.706       | 0.235           |                 |                     |                 |                     |              |                  |
| Average                  | 0.706       | 0.247           |                 |                     |                 |                     |              |                  |

Values are corrected, average, relative quantities of three technical replicates.

**Supplementary Table 3 | qPCR data for *S. purpuratus* GrIs.**

| Samples                              | <i>SpurGr1</i> | <i>SpurGr2</i> | <i>SpurGr3</i> | <i>SpurGr4</i> | <i>SpurGr5</i> |
|--------------------------------------|----------------|----------------|----------------|----------------|----------------|
| <i>unfertilised egg #1</i>           | 97             | 0              | 0              | 1              | 1              |
| <i>unfertilised egg #2</i>           | 93             | 0              | 1              | 0              | 1              |
| <i>mid-cleavage 7 hpf #1</i>         | 881            | 0              | 0              | 10             | 0              |
| <i>mid-cleavage 7 hpf #2</i>         | 215            | 0              | 0              | 2              | 3              |
| <i>late cleavage 12 hpf #1</i>       | 612            | 16             | 1              | 14             | 39             |
| <i>late cleavage 12 hpf #2</i>       | 1302           | 54             | 7              | 4              | 21             |
| <i>blastula 18 hpf #1</i>            | 2450           | 0              | 0              | 2              | 26             |
| <i>blastula 18 hpf #2</i>            | 1959           | 0              | 1              | 0              | 10             |
| <i>mesenchyme blastula 24 hpf #1</i> | 1824           | 0              | 0              | 7              | 20             |
| <i>mesenchyme blastula 24 hpf #2</i> | 1363           | 4              | 0              | 0              | 12             |
| <i>early gastrula 30 hpf #1</i>      | 2074           | 0              | 0              | 7              | 19             |
| <i>early gastrula 30 hpf #2</i>      | 1099           | 0              | 0              | 0              | 14             |
| <i>mid gastrula 40 hpf #1</i>        | 2139           | 10             | 14             | 23             | 14             |
| <i>mid gastrula 40 hpf #2</i>        | 1132           | 0              | 1              | 0              | 18             |
| <i>late gastrula 48 hpf #1</i>       | 1505           | 0              | 0              | 6              | 36             |
| <i>late gastrula 48 hpf #2</i>       | 1016           | 7              | 8              | 1              | 7              |
| <i>pluteus 72 hpf #1</i>             | 1454           | 29             | 2              | 22             | 25             |
| <i>pluteus 72 hpf #2</i>             | 1359           | 28             | 5              | 3              | 20             |

Values are averages of transcripts per embryo in 4 technical replicates.

## Supplementary References

1. Sinigaglia C, Busengdal H, Leclere L, Technau U, Rentzsch F. The bilaterian head patterning gene *six3/6* controls aboral domain development in a cnidarian. *PLOS Biol.* **11**, e1001488 (2013).
2. Tu Q, Cameron RA, Worley KC, Gibbs RA, Davidson EH. Gene structure in the sea urchin *Strongylocentrotus purpuratus* based on transcriptome analysis. *Genome Res.* **22**, 2079-2087 (2012).
3. Simakov O, *et al.* Insights into bilaterian evolution from three spiralian genomes. *Nature.* **493**, 526-531 (2013).
4. Zhang G, *et al.* The oyster genome reveals stress adaptation and complexity of shell formation. *Nature.* **490**, 49-54 (2012).
5. Sodergren E, *et al.* The genome of the sea urchin *Strongylocentrotus purpuratus*. *Science.* **314**, 941-952 (2006).
6. Shinzato C, *et al.* Using the *Acropora digitifera* genome to understand coral responses to environmental change. *Nature.* **476**, 320-323 (2011).
7. Putnam NH, *et al.* Sea anemone genome reveals ancestral eumetazoan gene repertoire and genomic organization. *Science.* **317**, 86-94 (2007).
8. Srivastava M, *et al.* The *Trichoplax* genome and the nature of placozoans. *Nature.* **454**, 955-960 (2008).
